# Supplementary material for: Predictive factors for brace treatment outcome in adolescent idiopathic scoliosis: a best-evidence synthesis
Source: Springer Nature journal article supplement (doi:10.1007/s00586-018-05870-6), 2019-01-03
Supplement: MOESM4 [file 16373104]

**eTable 4.** Results of the methodological quality assessment

| **Author, year** | **Total score** | **A** | **B** | **C** | **D** | **E** | **F** | **G** | **H** | **I** | **J** | **K** | **L** | **M** |
| --- | --- | --- | --- | --- | --- | --- | --- | --- | --- | --- | --- | --- | --- | --- |
| Emans, 1985[29] | 6 | 0 | 1 | 1 | 1 | 1 | 0 | 0 | 0 | 1 | 0 | 1 | 0 | 0 |
| Hanks, 1988[30]  Ylikoski, 1989[31]  Castelein, 1992[33]  Katz, 2001[13]  Castro, 2003[21]  Landauer, 2003[34]  Lou, 2004[35]  Bullmann, 2004[42]  O'Neill, 2005[36]  Rahman, 2005[32]  Lou, 2006[37]  Ryan, 2007[26]  Seifert, 2008[41]  Ovadia, 2012[38]  Weinstein, 2013[4]  Xu, 2015[23]  Lou, 2015[25]  Shi, 2015[39]  Kuroki, 2015[28]  Goodbody, 2016[22]  Karol, 2016[24]  Karol, 2016[12]  Sun, 2016[8]  Thompson, 2017[40]  Zaina, 2017[27] | 8  6  6  7  9*  7  5  7  8  8  7  9*  7  8  10*  9*  9*  8  9*  9*  10*  9*  8  8  10* | 1  0  0  1  1  0  0  0  0  0  0  1  1  0  1  1  0  1  0  1  1  1  0  1  1 | 1  1  1  1  1  1  1  1  1  1  0  1  1  1  1  1  1  1  1  1  1  1  1  1  1 | 1  1  0  0  1  0  1  1  1  1  1  1  0  1  1  1  1  1  1  1  1  1  1  1  1 | 1  1  0  1  1  1  0  1  1  1  0  1  1  1  1  1  1  1  1  1  1  0  1  1  0 | 1  1  1  1  1  1  1  1  1  1  1  1  1  1  1  1  1  1  1  1  1  1  1  1  1 | 0  0  0  0  1  1  0  1  0  0  1  1  1  1  1  0  1  0  1  0  1  1  0  0  1 | 0  0  0  0  0  0  0  0  0  1  0  0  0  0  1  0  0  0  1  0  1  1  0  0  1 | 0  0  0  0  0  0  0  0  0  0  0  0  0  0  0  0  0  0  0  0  0  0  0  0  0 | 1  1  1  1  1  1  1  1  1  1  1  1  1  1  1  1  1  1  1  1  1  1  1  1  1 | 0  0  0  0  0  0  0  0  0  0  0  0  0  0  0  0  0  0  0  0  0  0  0  0  0 | 1  1  1  1  1  1  1  1  1  1  1  1  1  1  1  1  1  1  1  1  1  1  1  1  1 | 1  0  1  1  1  1  0  0  1  1  1  1  0  1  1  1  1  1  1  1  1  1  1  1  1 | 0  0  1  0  0  0  0  0  1  0  1  0  0  0  0  1  1  0  0  1  0  0  1  0  1 |
